# Supplementary material
Source: PubMed Central journal article supplement (PMC2229867)

**A**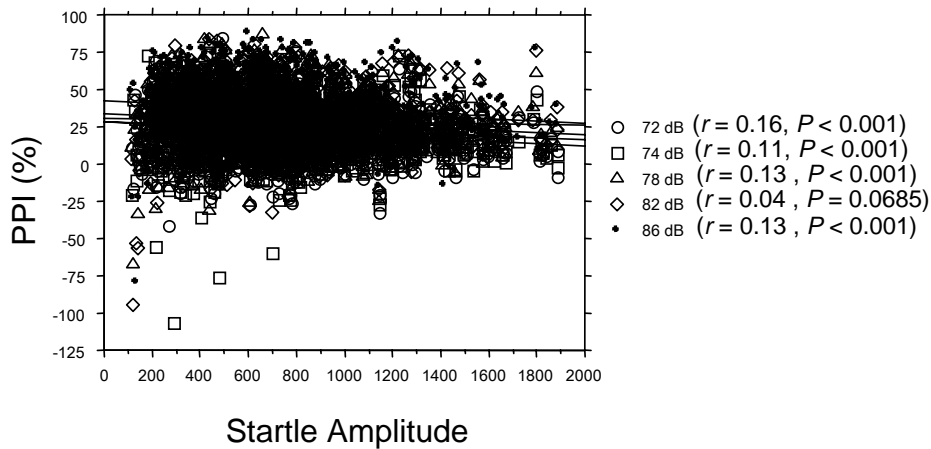**B**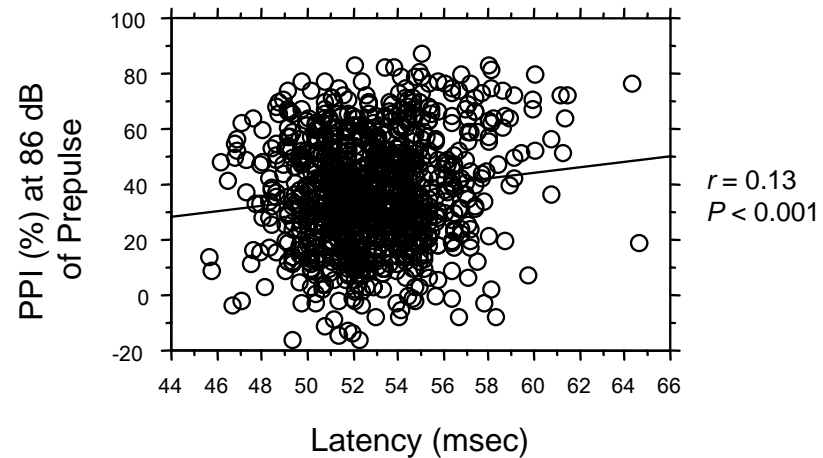**C**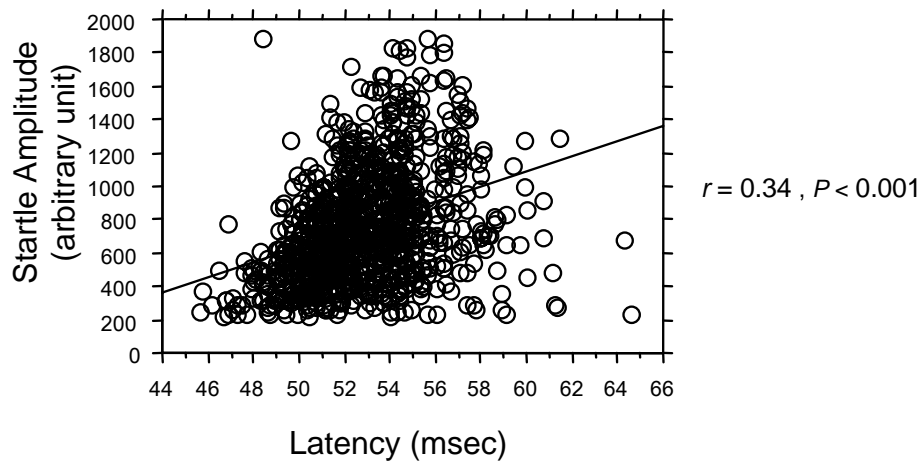**D**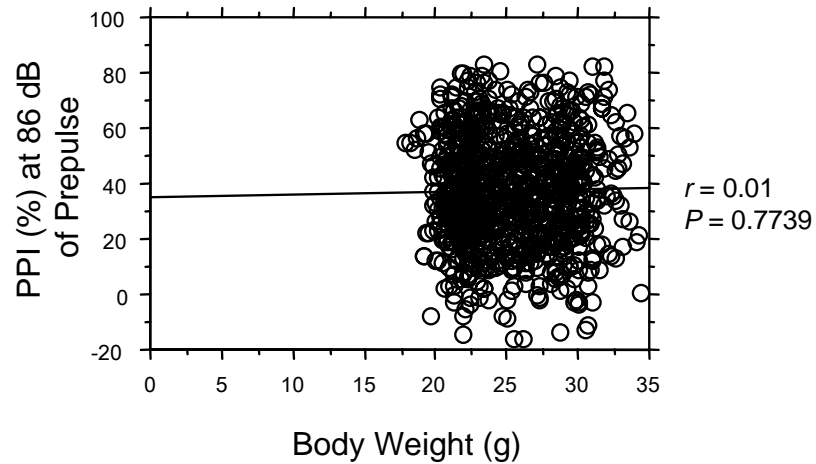

Supplement: pbio.0050297.sg005.pdf [file pbio.0050297.sg005.pdf]

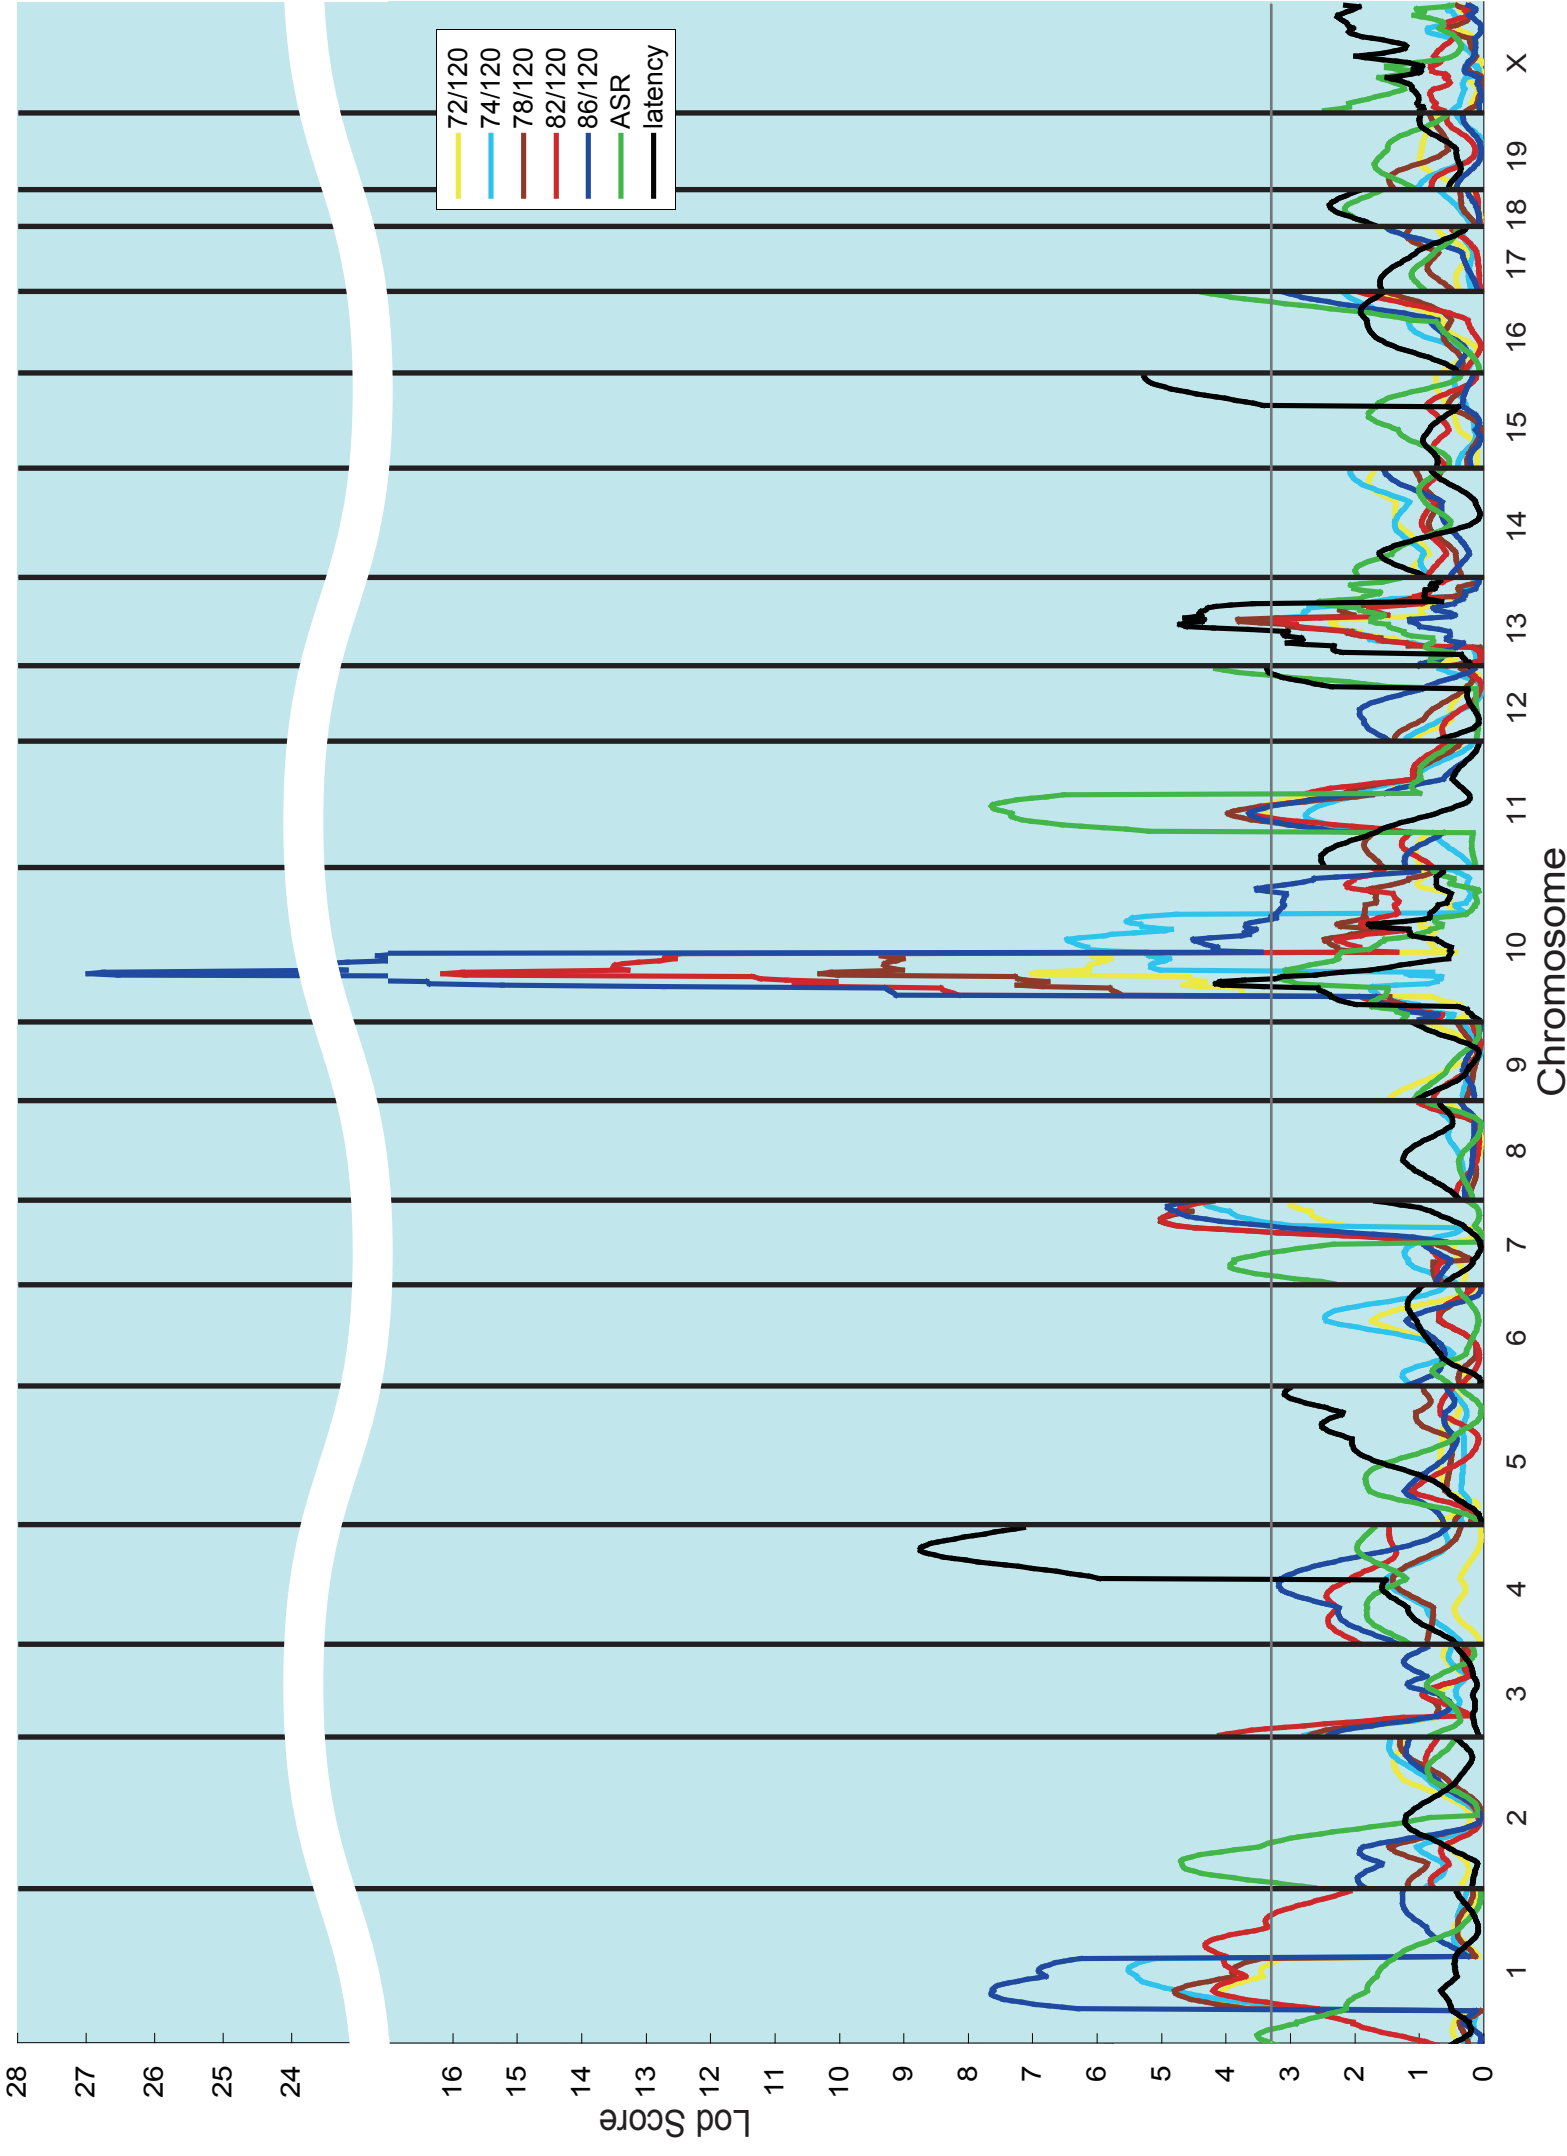

Supplement: pbio.0050297.sg006.pdf [file pbio.0050297.sg006.pdf]

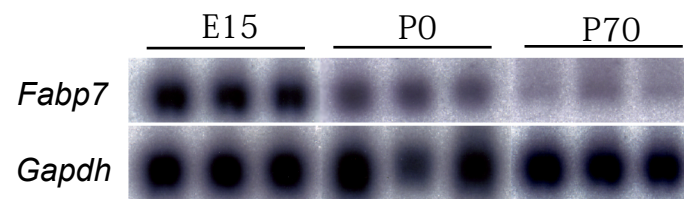

Supplement: pbio.0050297.sg009.pdf [file pbio.0050297.sg009.pdf]
